# Supplementary material for: The formation of PuSiO4under hydrothermal conditions
Source: Royal Society of Chemistry journal article supplement (doi:10.1039/d0dt01183e), 2020-01-01
Supplement: d0dt01183e1.pdf [file d0dt01183e1.pdf]

# Formation of PuSiO<sub>4</sub> under hydrothermal conditions

Paul Estevenon<sup>1,2,3,4</sup>, Eleonore Welcomme<sup>1,\*</sup>, Christelle Tamain<sup>1</sup>, Gauthier Jouan<sup>1</sup>, Stephanie Szenknect<sup>2</sup>, Adel Mesbah<sup>2</sup>, Christophe Poinssot<sup>1</sup>, Philippe Moisy<sup>1</sup>, Nicolas Dacheux<sup>2,\*</sup>

<sup>1</sup> CEA, DEN, DMRC, Univ Montpellier, Marcoule, France.

<sup>2</sup> ICSM, Univ Montpellier, CNRS, CEA, ENSCM, Bagnols-sur-Cèze, France

<sup>3</sup> The European Synchrotron, CS40220, 38043 Grenoble Cedex 9, France.

<sup>4</sup> Helmholtz Zentrum Dresden-Rossendorf (HZDR), Institute of Resource Ecology, P.O. Box 510119, 01314, Dresden, Germany.

## SUPPORTING INFORMATION

### Experimental procedures

#### **Syntheses in ligand free reactive media**

Syntheses were carried out by adapting the protocol we recently described for the ThSiO<sub>4</sub> synthesis.<sup>1</sup> An aqueous silicate solution was prepared by dissolving Na<sub>2</sub>SiO<sub>3</sub> into water, then a volume of Pu(IV) nitric acid solution was added to obtain a solution with C<sub>Pu</sub> = 0.21 mol·L<sup>-1</sup> and a silicate excess of 3 mol.% in the reacting mixture (synthesis pathway A1 in **Table S2**). The pH was then adjusted to the final expected value with 8 mol·L<sup>-1</sup> NaOH.

All of the mixtures were prepared under aerated conditions and put into 23 mL Teflon lined reactors in Parr autoclaves and then treated in hydrothermal conditions for 7 to 15 days at a temperature ranging from 60°C to 237°C under autogenous pressure (under air atmosphere). Thus, the precipitates obtained were separated from the supernatant by centrifugation for 1 min at 14 000 rpm, washed twice with deionized water and once with ethanol, and then finally dried overnight under the glovebox atmosphere.

### Syntheses in carbonate ion rich reactive media

Syntheses were carried out by adapting the protocol we recently described for the  $\text{ThSiO}_4$  synthesis<sup>2</sup> and the conditions defined by Mesbah et al. for the  $\text{USiO}_4$  synthesis.<sup>3</sup> An aqueous silicate solution was prepared by dissolving  $\text{Na}_2\text{SiO}_3$  into water, then a volume of Pu(IV) nitric acid solution was added to obtain a solution with  $C_{\text{Pu}} = 0.21 \text{ mol}\cdot\text{L}^{-1}$  and a silicate excess of 3 mol.% in the reacting mixture. The pH was then adjusted with  $8 \text{ mol}\cdot\text{L}^{-1}$  NaOH to be close to pH = 8 (synthesis pathway B2 in **Table S2**) or in order to obtain a pH value between pH = 10 and pH = 12 (synthesis pathway B3 in **Table S2**). Controlled amounts of  $\text{NaHCO}_3$  were then added to obtain a pH close to pH = 8.7.

Additional experiments were performed starting from Pu(IV) stabilized in a carbonate ions rich aqueous solution. Then this solution was put in contact with an aqueous silicate solution in order to obtain a solution with  $C_{\text{Pu}} = 0.21 \text{ mol}\cdot\text{L}^{-1}$  and a silicate excess of 3 mol.% in the reacting mixture (synthesis pathway B4 in **Table S2**).

All of the mixtures were prepared under air atmosphere and put into 23 mL Teflon lined reactors in Parr autoclaves and then treated in hydrothermal conditions for 10 to 15 days at a temperature ranging from  $150^\circ\text{C}$  to  $237^\circ\text{C}$  under autogenous pressure (under air atmosphere). Thus, the precipitates obtained were separated from the supernatant by centrifugation for 1 min at 14 000 rpm, washed twice with deionized water and once with ethanol, and then finally dried overnight under the glovebox atmosphere.

**Table S1** Unit cell parameters determined by Rietveld refinement.

| Silicate Phase                                                | Space group          | Lattice parameters |             |             |           |                          |
|---------------------------------------------------------------|----------------------|--------------------|-------------|-------------|-----------|--------------------------|
|                                                               |                      | a                  | b           | c           | $\beta$   | V                        |
| Pu <sub>4.67</sub> (SiO <sub>4</sub> ) <sub>3</sub> O<br>4, 5 | P6 <sub>3</sub> /m   | 9.572(1) Å         |             | 7.005(2) Å  |           | 555.8(1) Å <sup>3</sup>  |
|                                                               |                      | 9.589 Å            |             | 7.019 Å     |           |                          |
|                                                               |                      | 9.599 Å            |             | 7.020 Å     |           |                          |
| Pu <sub>2</sub> Si <sub>2</sub> O <sub>7</sub><br>6           | P2 <sub>1</sub> /n   | 8.646(1) Å         | 12.913(2) Å | 5.390(1) Å  | 90.14(1)° | 601.8(1) Å <sup>3</sup>  |
|                                                               |                      | 8.664 Å            | 12.96 Å     | 5.397 Å     |           |                          |
| PuSiO <sub>4</sub><br>7, 8                                    | I4 <sub>1</sub> /amd | 6.9676(9) Å        |             | 6.2007(9) Å |           | 301.05(7) Å <sup>3</sup> |
|                                                               |                      | 6.906(6) Å         |             | 6.221(6) Å  |           | 296.6(5) Å <sup>3</sup>  |

**Table S2** Constants of complexation of An(IV)/Ce(IV) limit complexes with carbonates ions at I = 0 (25 °C).

| Ln/An | Ionic radii<br><sub>viii</sub> M <sup>4+</sup> (Å) <sup>9</sup> | Log( $\beta^{\circ}_5$ ) <sup>a</sup> | Log( $\beta^{\circ}_6$ ) <sup>a</sup> | Reference |
|-------|-----------------------------------------------------------------|---------------------------------------|---------------------------------------|-----------|
| Pu    | 0.96                                                            | 35.7 ± 1.1                            | —                                     | 10        |
| Ce    | 0.97                                                            | ≤ 41.8 ± 0.5                          | 42.2 ± 0.5                            | 11        |
| U     | 1.00                                                            | 34.0 ± 0.9                            | —                                     | 10        |
| Th    | 1.05                                                            | 31.0 ± 0.7                            | —                                     | 12        |

<sup>a</sup>  $\beta^{\circ}_n$  is associated with the reaction  $An^{4+} + nCO_3^{2-} = An(CO_3)_n^{(2n-4)-}$ .

**Table S3.** Thermodynamic data for the main reactions involving Pu(III), Pu(IV), hydroxide and silicate complexes in the considered system at I = 0 (25°C).

| Reaction                                                                                                                    | log K°                          |
|-----------------------------------------------------------------------------------------------------------------------------|---------------------------------|
| $\text{H}_4\text{SiO}_4 \rightleftharpoons \text{H}_2\text{SiO}_4^{2-} + 2 \text{H}^+$                                      | - 23.14 <sup>13</sup>           |
| $\text{H}_4\text{SiO}_4 \rightleftharpoons \text{H}_3\text{SiO}_4^- + \text{H}^+$                                           | - 9.84 <sup>13</sup>            |
| $2 \text{H}_4\text{SiO}_4 \rightleftharpoons \text{Si}_2\text{O}_2(\text{OH})_5^- + \text{H}^+ + \text{H}_2\text{O}$        | - 8.50 <sup>13</sup>            |
| $2 \text{H}_4\text{SiO}_4 \rightleftharpoons \text{Si}_2\text{O}_3(\text{OH})_4^{2-} + 2 \text{H}^+ + \text{H}_2\text{O}$   | - 19.40 <sup>13</sup>           |
| $3 \text{H}_4\text{SiO}_4 \rightleftharpoons \text{Si}_3\text{O}_5(\text{OH})_5^{3-} + 3 \text{H}^+ + 2\text{H}_2\text{O}$  | - 29.40 <sup>13</sup>           |
| $3 \text{H}_4\text{SiO}_4 \rightleftharpoons \text{Si}_3\text{O}_6(\text{OH})_3^{3-} + 3 \text{H}^+ + 3 \text{H}_2\text{O}$ | - 29.30 <sup>13</sup>           |
| $4 \text{H}_4\text{SiO}_4 \rightleftharpoons \text{Si}_4\text{O}_6(\text{OH})_6^{2-} + 2 \text{H}^+ + 4 \text{H}_2\text{O}$ | - 15.60 <sup>13</sup>           |
| $4 \text{H}_4\text{SiO}_4 \rightleftharpoons \text{Si}_4\text{O}_7(\text{OH})_6^{4-} + 4 \text{H}^+ + 3 \text{H}_2\text{O}$ | - 39.10 <sup>13</sup>           |
| $4 \text{H}_4\text{SiO}_4 \rightleftharpoons \text{Si}_4\text{O}_8(\text{OH})_4^{4-} + 4 \text{H}^+ + 4 \text{H}_2\text{O}$ | - 39.20 <sup>13</sup>           |
| $6 \text{H}_4\text{SiO}_4 \rightleftharpoons \text{Si}_6\text{O}_{15}^{6-} + 6 \text{H}^+ + 9 \text{H}_2\text{O}$           | - 61.80 <sup>13</sup>           |
| $\text{Pu}^{3+} + \text{H}_2\text{O} \rightleftharpoons \text{Pu}(\text{OH})^{2+} + \text{H}^+$                             | - 6.9 <sup>14</sup>             |
| $\text{Pu}^{3+} + 2 \text{H}_2\text{O} \rightleftharpoons \text{Pu}(\text{OH})_2^+ + 2 \text{H}^+$                          | - 15.1 <sup>14</sup>            |
| $\text{Pu}^{3+} + 3 \text{H}_2\text{O} \rightleftharpoons \text{Pu}(\text{OH})_3 + 3 \text{H}^+$                            | - 25.3 <sup>14</sup>            |
| $\text{Pu}^{4+} + \text{H}_2\text{O} \rightleftharpoons \text{Pu}(\text{OH})^{3+} + \text{H}^+$                             | 0.6 <sup>14</sup>               |
| $\text{Pu}^{4+} + 2 \text{H}_2\text{O} \rightleftharpoons \text{Pu}(\text{OH})_2^{2+} + 2 \text{H}^+$                       | 0.6 <sup>14</sup>               |
| $\text{Pu}^{4+} + 3 \text{H}_2\text{O} \rightleftharpoons \text{Pu}(\text{OH})_3^+ + 3 \text{H}^+$                          | - 2.3 <sup>14</sup>             |
| $\text{Pu}^{4+} + 4 \text{H}_2\text{O} \rightleftharpoons \text{Pu}(\text{OH})_4 + 4 \text{H}^+$                            | - 4.1 <sup>14</sup>             |
| $\text{Pu}^{3+} + \text{H}_4\text{SiO}_4 \rightleftharpoons \text{Pu}(\text{OSi}(\text{OH})_3)_2^+ + \text{H}^+$            | - 1.7 (this study – Figure S16) |
| $\text{Pu}^{4+} + \text{H}_4\text{SiO}_4 \rightleftharpoons \text{Pu}(\text{OSi}(\text{OH})_3)_3^+ + \text{H}^+$            | 2.0 <sup>15</sup>               |
| $\text{Pu}(\text{OH})_3, \text{solid} + 3 \text{H}^+ = \text{Pu}^{3+} + 3 \text{H}_2\text{O}$                               | 15.8 <sup>14</sup>              |
| $\text{PuO}_2 \cdot x\text{H}_2\text{O}_{\text{solid}} + (2-x) \text{H}_2\text{O} = \text{Pu}^{4+} + 4 \text{HO}^-$         | - 58.5 <sup>16</sup>            |

**Table S4.** Equilibrium constants of M(III)- and M(IV)-hydroxide and silicate complexes at I = 0 (25°C).

| <b>Reaction</b>                                                                                        | <b>log <math>\beta^\circ</math></b> |
|--------------------------------------------------------------------------------------------------------|-------------------------------------|
| $\text{Eu}^{3+} + \text{HO}^- \rightleftharpoons \text{Eu}(\text{OH})^{2+}$                            | 6.2 <sup>17</sup>                   |
| $\text{Eu}^{3+} + \text{H}_3\text{SiO}_4^- \rightleftharpoons \text{Eu}(\text{OSi}(\text{OH})_3)^{2+}$ | 8.04 ± 0.08 <sup>18</sup>           |
| $\text{Am}^{3+} + \text{HO}^- \rightleftharpoons \text{Am}(\text{OH})^{2+}$                            | 7.6 ± 0.7 <sup>10</sup>             |
| $\text{Am}^{3+} + \text{H}_3\text{SiO}_4^- \rightleftharpoons \text{Am}(\text{OSi}(\text{OH})_3)^{2+}$ | 8.23 ± 0.09 <sup>18</sup>           |
| $\text{Cm}^{3+} + \text{HO}^- \rightleftharpoons \text{Cm}(\text{OH})^{2+}$                            | 6.4 ± 0.1 <sup>10</sup>             |
| $\text{Cm}^{3+} + \text{H}_3\text{SiO}_4^- \rightleftharpoons \text{Cm}(\text{OSi}(\text{OH})_3)^{2+}$ | 7.94 ± 0.06 <sup>18</sup>           |
| $\text{Al}^{3+} + \text{HO}^- \rightleftharpoons \text{Al}(\text{OH})^{2+}$                            | 9.05 <sup>13</sup>                  |
| $\text{Al}^{3+} + \text{H}_3\text{SiO}_4^- \rightleftharpoons \text{Al}(\text{OSi}(\text{OH})_3)^{2+}$ | 8.73 ± 0.06 <sup>19</sup>           |
| $\text{Fe}^{3+} + \text{HO}^- \rightleftharpoons \text{Fe}(\text{OH})^{2+}$                            | 11.81 <sup>13</sup>                 |
| $\text{Fe}^{3+} + \text{H}_3\text{SiO}_4^- \rightleftharpoons \text{Fe}(\text{OSi}(\text{OH})_3)^{2+}$ | 9.33 ± 0.26 <sup>20</sup>           |
| $\text{Pu}^{3+} + \text{HO}^- \rightleftharpoons \text{Pu}(\text{OH})^{2+}$                            | 7.1 ± 0.3 <sup>14</sup>             |
| $\text{Pu}^{3+} + \text{H}_3\text{SiO}_4^- \rightleftharpoons \text{Pu}(\text{OSi}(\text{OH})_3)^{2+}$ | 8.2 (this study – Figure S16)       |
| $\text{Pu}^{4+} + \text{H}_3\text{SiO}_4^- \rightleftharpoons \text{Pu}(\text{OSi}(\text{OH})_3)^{3+}$ | 11.8 <sup>15</sup>                  |

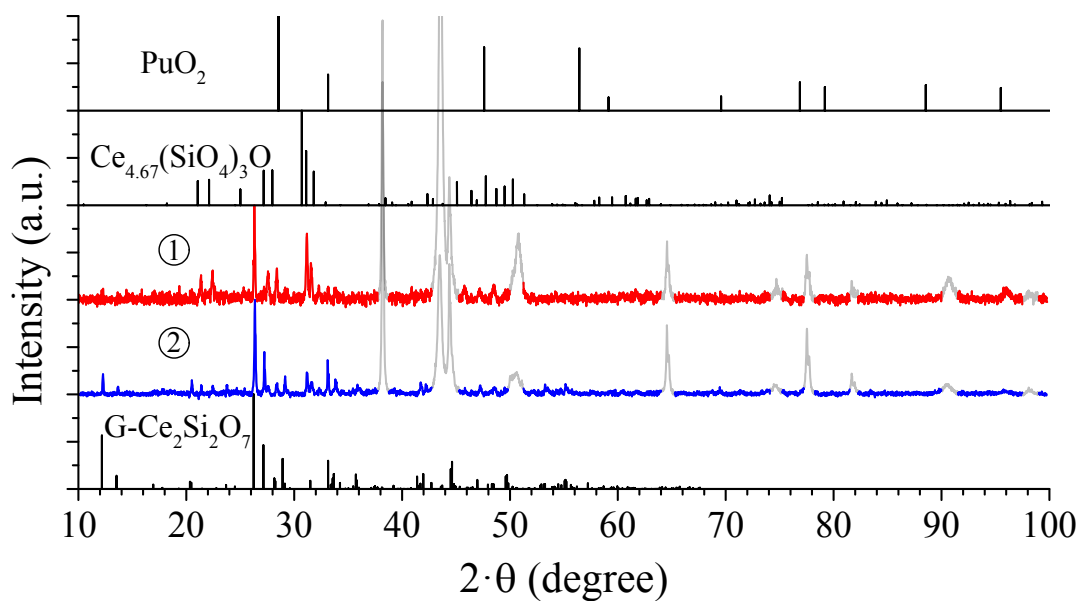

**Figure S1** PXRD patterns obtained for  $\text{Pu}_{4.67}(\text{SiO}_4)_3\text{O}$  (1) and  $\text{Pu}_2\text{Si}_2\text{O}_7$  (2) prepared after a 9 hour-long heat treatment at  $1350^\circ\text{C}$  under  $\text{Ar-H}_2$  (4%) atmosphere. Characteristic XRD lines of  $\text{PuO}_2$ ,  $\text{G-Ce}_2\text{Si}_2\text{O}_7$  and  $\text{Ce}_{4.67}(\text{SiO}_4)_3\text{O}$  were extracted from references 21, 22 and 22, respectively.

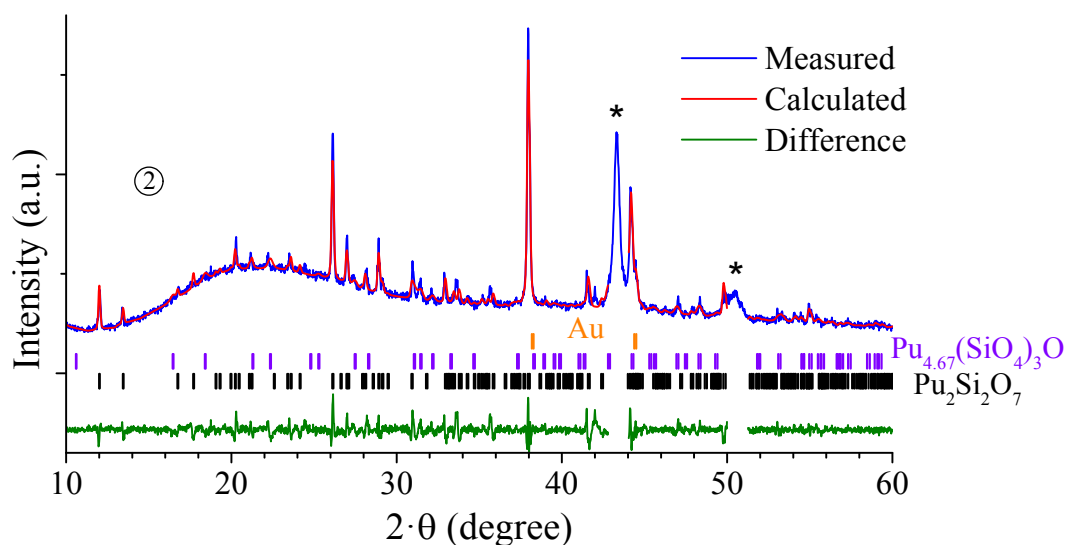

**Figure S2** X-ray powder diffraction profile, calculated and difference profile after Rietveld refinement for a  $\text{Pu}_2\text{Si}_2\text{O}_7$  sample (2) prepared after a 9 hour-long heat treatment at  $1350^\circ\text{C}$  under  $\text{Ar-H}_2$  (4%) atmosphere. XRD lines of sample holder are pointed out by an asterisk.

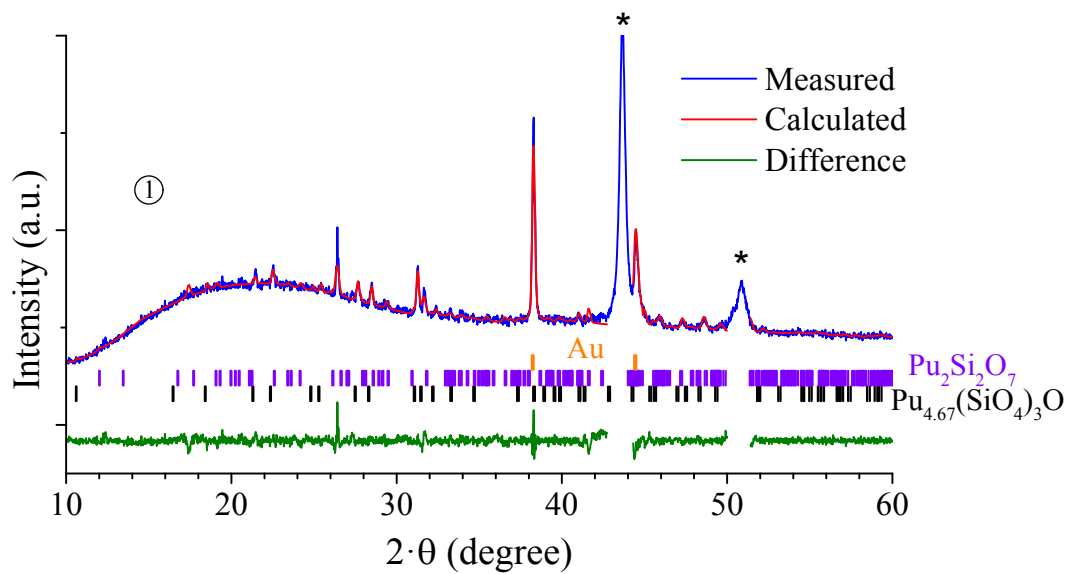

**Figure S3** X-ray powder diffraction profile, calculated and difference profile after Rietveld refinement for a Pu<sub>4.67</sub>(SiO<sub>4</sub>)<sub>3</sub>O sample (1) prepared after a 9 hour-long heat treatment at 1350°C under Ar-H<sub>2</sub> (4%) atmosphere. XRD lines of sample holder are pointed out by an asterisk.

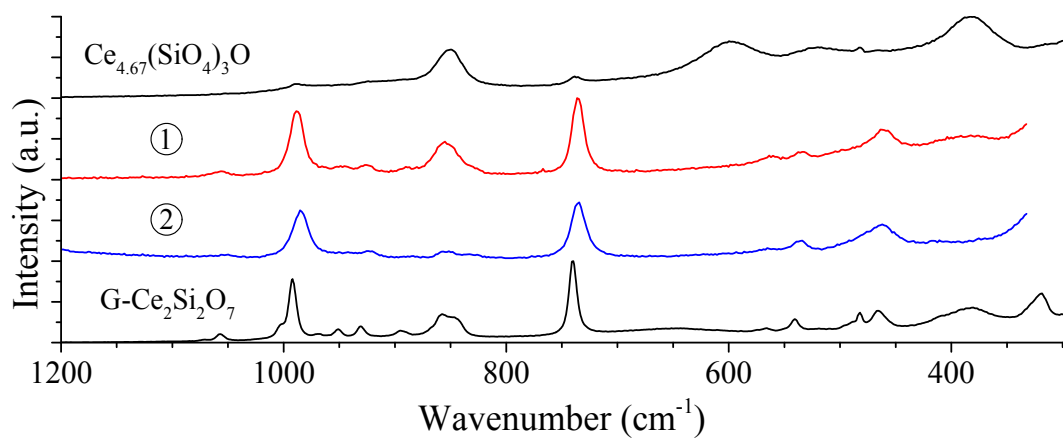

(b)

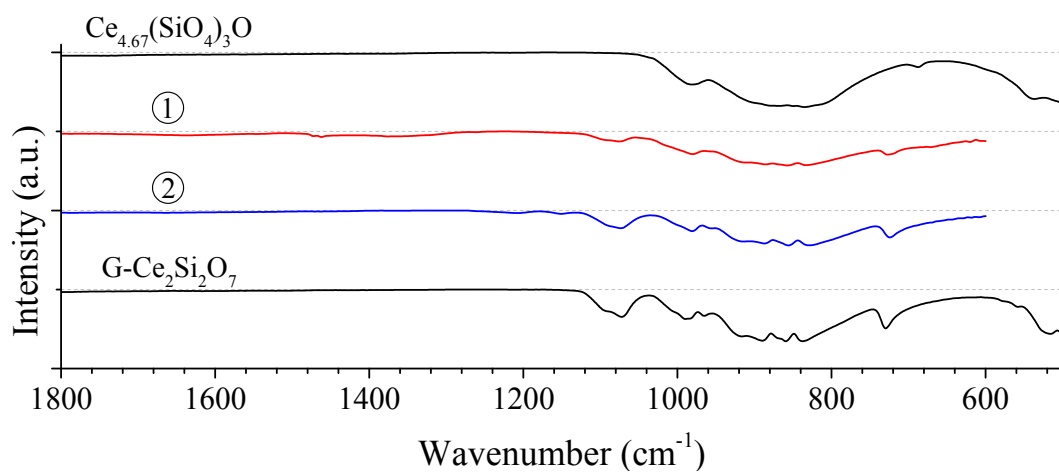

**Figure S4** Raman (a) and infrared (b) spectra obtained for  $Pu_{4.67}(SiO_4)_3O$  (1) and  $Pu_2Si_2O_7$  (2) prepared after a 9 hour-long heat treatment at 1350°C under Ar-H<sub>2</sub> (4%) atmosphere.  $G-Ce_2Si_2O_7$  and  $Ce_{4.67}(SiO_4)_3O$  were extracted from reference 23.



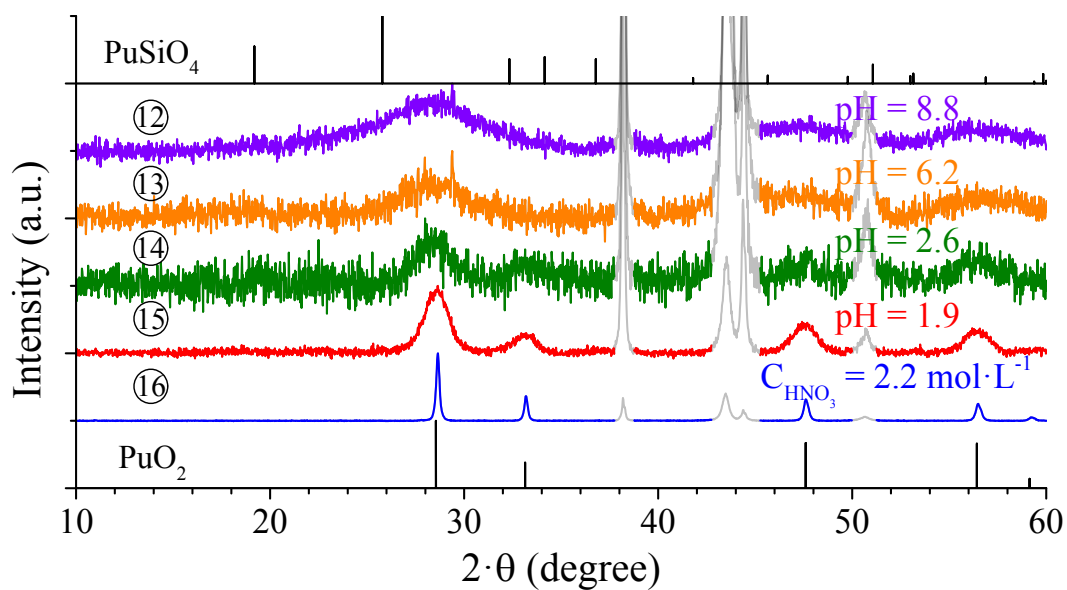

**Figure S5** PXRD patterns obtained for samples prepared under hydrothermal conditions ( $T = 150^{\circ}\text{C}$ ) with starting silicate and plutonium(IV) concentrations of  $0.21 \text{ mol}\cdot\text{L}^{-1}$  and for starting pH values of 8.8 (12), 6.2 (13), 2.6 (14), 1.9 (15) and  $[\text{H}_3\text{O}^+] = 2.2 \text{ mol}\cdot\text{L}^{-1}$  (16). Characteristic XRD lines of  $\text{PuO}_2$  and  $\text{PuSiO}_4$  were extracted from references 21 and 7, respectively.

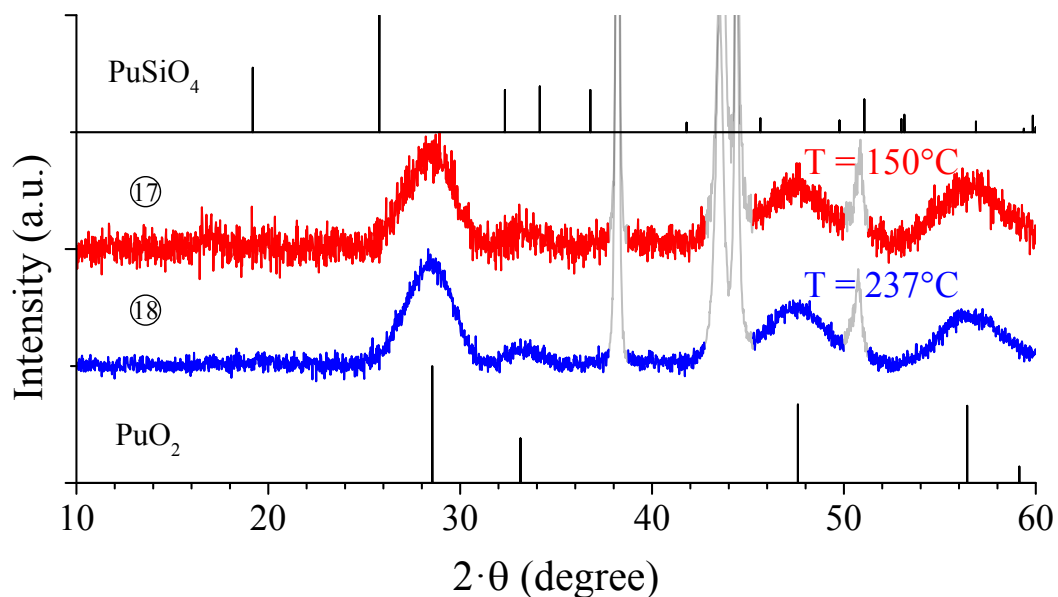

**Figure S6** PXRD patterns obtained for samples prepared according to the protocol described by Keller<sup>7</sup> with starting silicate and plutonium(IV) concentrations of  $0.21 \text{ mol}\cdot\text{L}^{-1}$  at  $T = 150^{\circ}\text{C}$  (17) and  $T = 237^{\circ}\text{C}$  (18). Characteristic XRD lines of  $\text{PuO}_2$  and  $\text{PuSiO}_4$  were extracted from references 21 and 7, respectively.

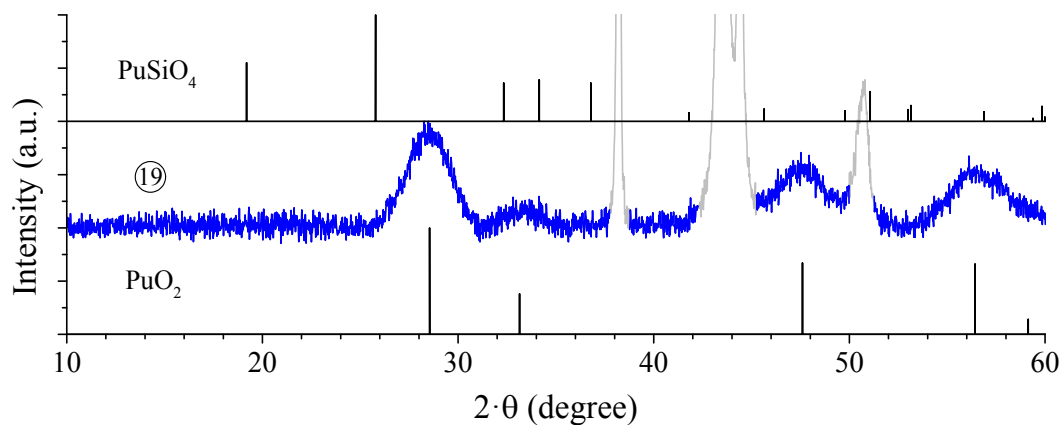

**Figure S7** PXRD patterns obtained for a sample prepared according to the protocol identified for  $\text{ThSiO}_4$  synthesis<sup>2</sup> with starting silicate and plutonium(IV) concentrations of  $0.21 \text{ mol}\cdot\text{L}^{-1}$  at  $T = 237^\circ\text{C}$  (19). Characteristic XRD lines of  $\text{PuO}_2$  and  $\text{PuSiO}_4$  were extracted from references 21 and 7, respectively.

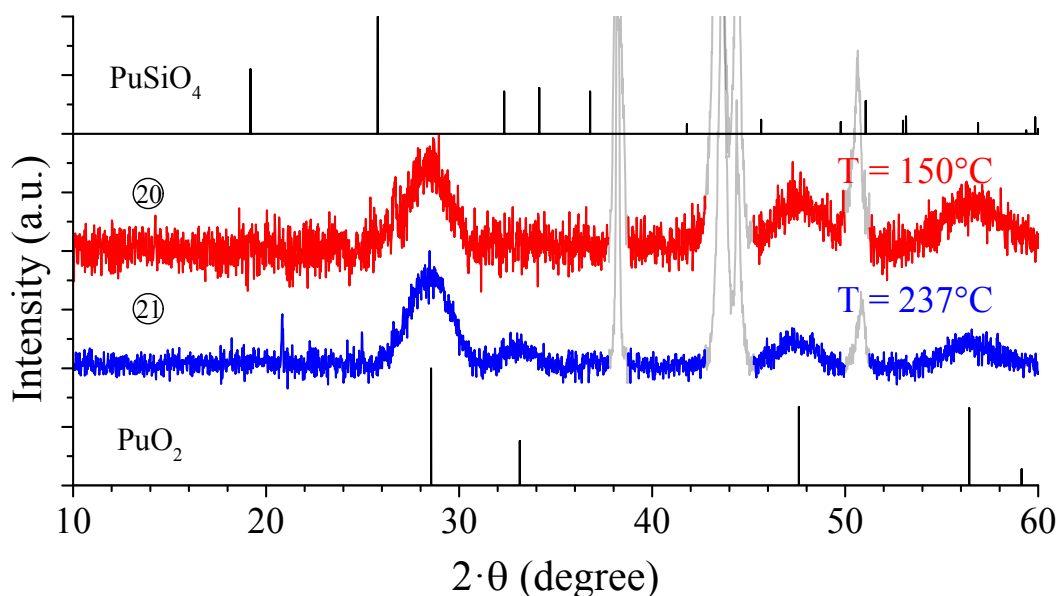

**Figure S8** PXRD patterns obtained for samples prepared according to the protocol identified for  $\text{USiO}_4$  syntheses<sup>3</sup> with starting silicate and plutonium(IV) concentrations of  $0.21 \text{ mol}\cdot\text{L}^{-1}$  at  $T = 150^\circ\text{C}$  (20) and  $T = 237^\circ\text{C}$  (21). Characteristic XRD lines of  $\text{PuO}_2$  and  $\text{PuSiO}_4$  were extracted from references 21 and 7, respectively.

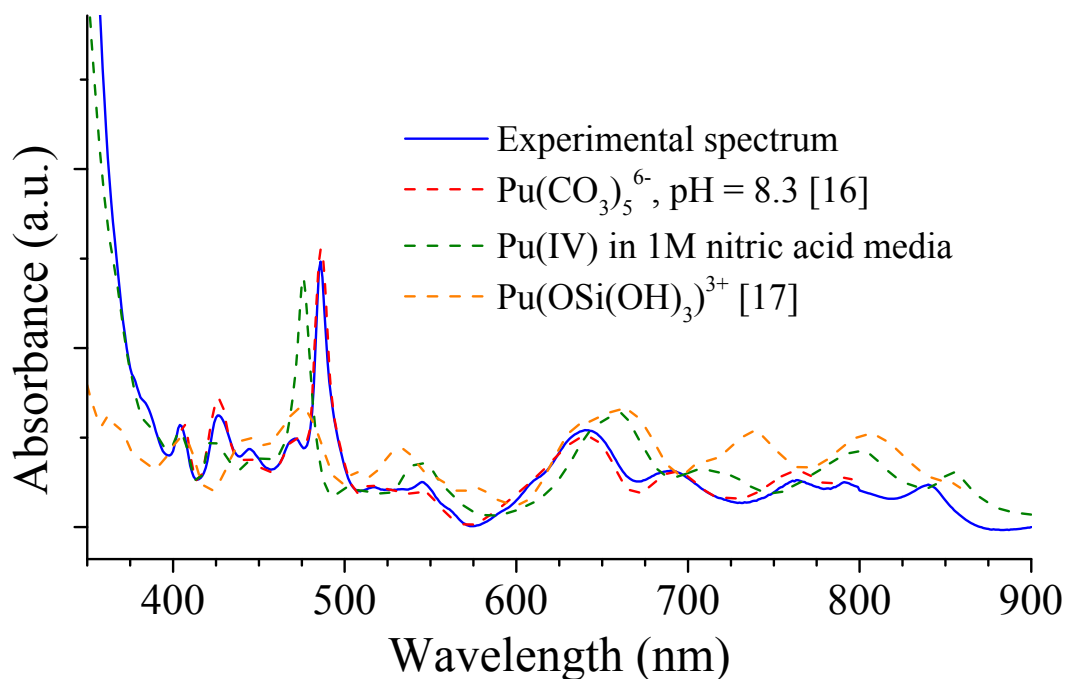

**Figure S9** Visible spectrum of sample (27) reactive media prior to the hydrothermal treatment. Reference spectra for  $\text{Pu}(\text{CO}_3)_5^{6-}$  at pH = 8.3 and  $\text{Pu}(\text{OSi}(\text{OH})_3)^{3+}$  were respectively extracted from references 24 and 15.

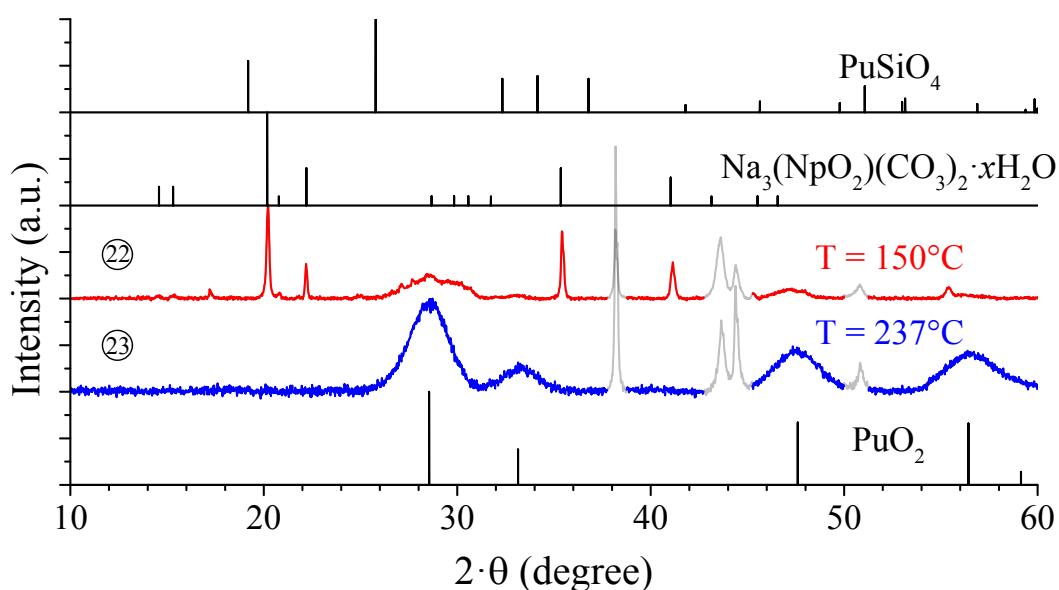

**Figure S10** PXRD patterns obtained for samples prepared from the plutonium stabilized in carbonate ions rich reactive media under hydrothermal conditions with starting silicate and plutonium(IV) concentrations of  $0.21 \text{ mol}\cdot\text{L}^{-1}$  at  $T = 150^\circ\text{C}$  (22) and  $T = 237^\circ\text{C}$  (23). Characteristic XRD lines of  $\text{PuO}_2$ ,  $\text{Na}_3(\text{NpO}_2)(\text{CO}_3)_2\cdot x\text{H}_2\text{O}$  and  $\text{PuSiO}_4$  were extracted from references 21, 25 and 7, respectively.

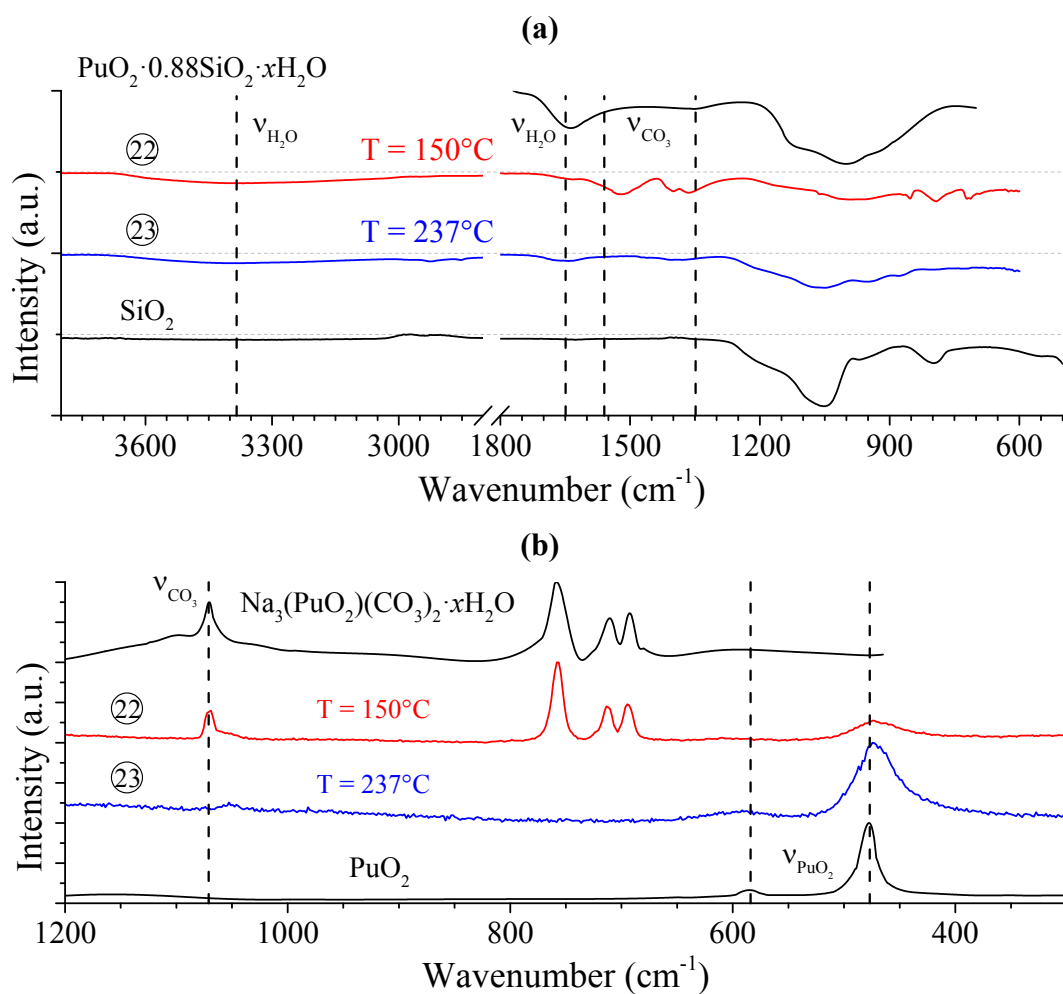

**Figure S11** Infrared (a) and Raman (b) spectra obtained for samples prepared with the plutonium stabilized in carbonate ions rich reactive media under hydrothermal conditions with starting silicate and plutonium(IV) concentrations of  $0.21 \text{ mol} \cdot \text{L}^{-1}$  at  $T = 150^\circ\text{C}$  (22) and  $T = 237^\circ\text{C}$  (23).  $\text{PuO}_2 \cdot 0.88\text{SiO}_2 \cdot x\text{H}_2\text{O}$  infrared spectrum was extracted from reference 26.  $\text{Na}_3(\text{PuO}_2)(\text{CO}_3)_2 \cdot x\text{H}_2\text{O}$  and  $\text{PuO}_2$  Raman spectra were respectively extracted from references 27 and 28.

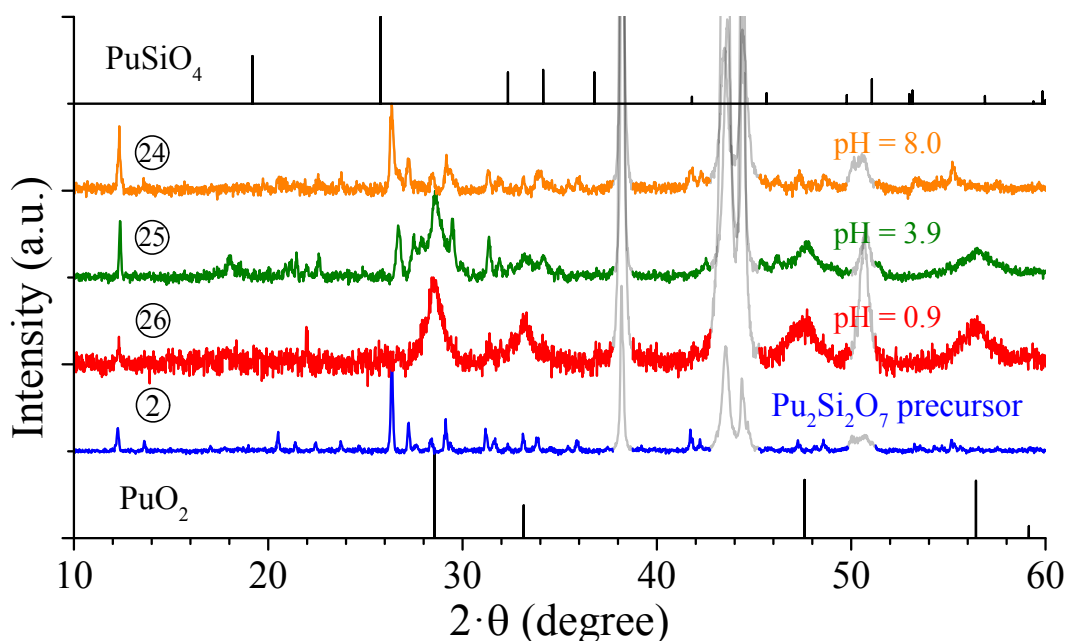

**Figure S12** PXRD patterns obtained after hydrothermal treatment ( $T = 150^{\circ}\text{C}$ ,  $t = 20$  days, air atmosphere) of  $\text{Pu}_2\text{Si}_2\text{O}_7$  reactant (2) with 0.84 mmol of Pu in nitric media (4mL) for starting pH values of 8.0 (24), 3.9 (25) and 0.9 (26). Characteristic XRD lines of  $\text{PuO}_2$  and  $\text{PuSiO}_4$  were extracted from reference 21 and 7, respectively.

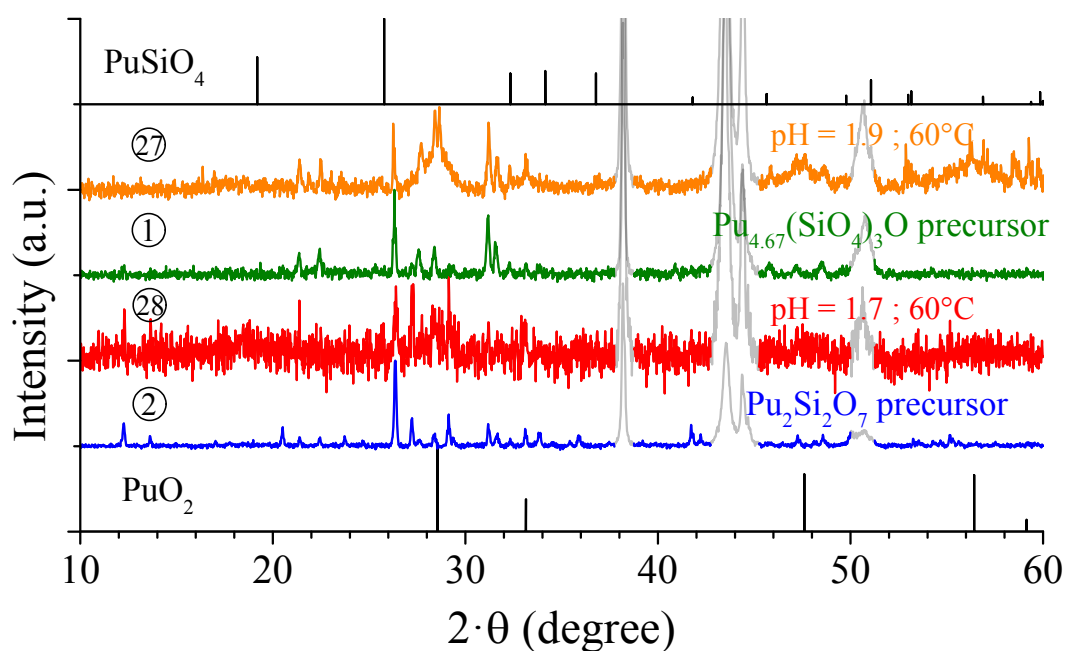

**Figure S13** PXRD patterns obtained after treatment in aqueous solution ( $T = 60^{\circ}\text{C}$ ,  $t = 21$  days, air atmosphere) of  $\text{Pu}_{4.67}(\text{SiO}_4)_3\text{O}$  (1) and  $\text{Pu}_2\text{Si}_2\text{O}_7$  reactant (2) with 0.84 mmol of Pu in nitric media (4mL) for starting pH values of 1.9 (27) and 1.7 (28). Characteristic XRD lines of  $\text{PuO}_2$  and  $\text{PuSiO}_4$  were extracted from reference 21 and 7, respectively.

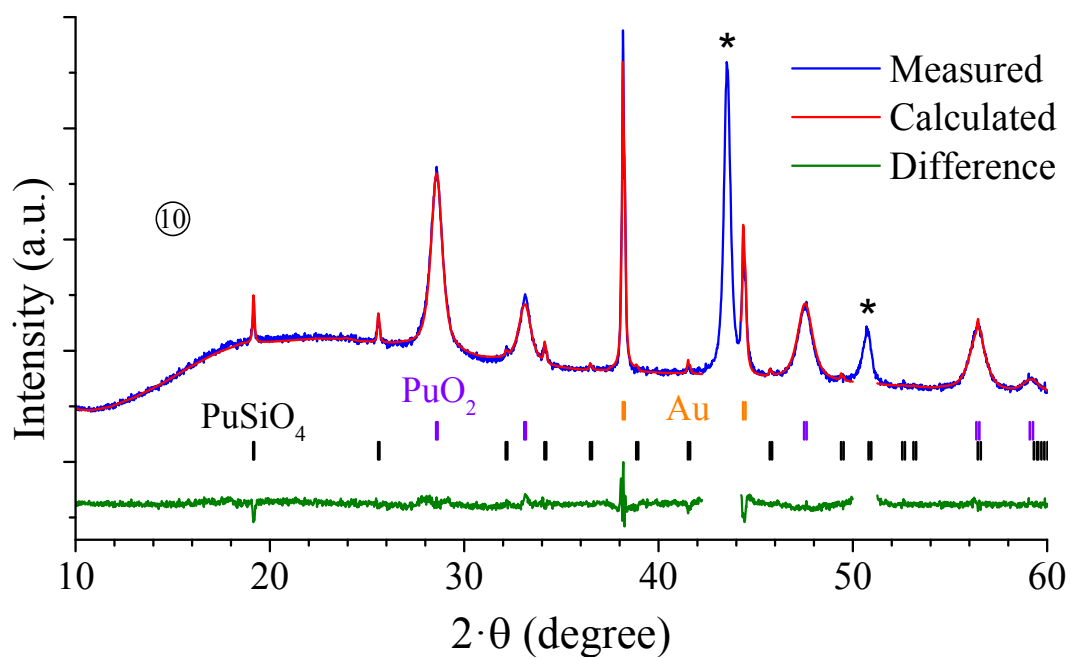

**Figure S14** X-ray powder diffraction profile, calculated and difference profile after Rietveld refinement for a  $\text{PuSiO}_4$  containing sample (10) from  $\text{Pu}_{4.67}(\text{SiO}_4)_3\text{O}$  reactant (1) with 0.84 mmol of Pu in hydrochloric media (4mL) for starting pH values of 4.0. XRD lines of sample holder are pointed out by an asterisk.

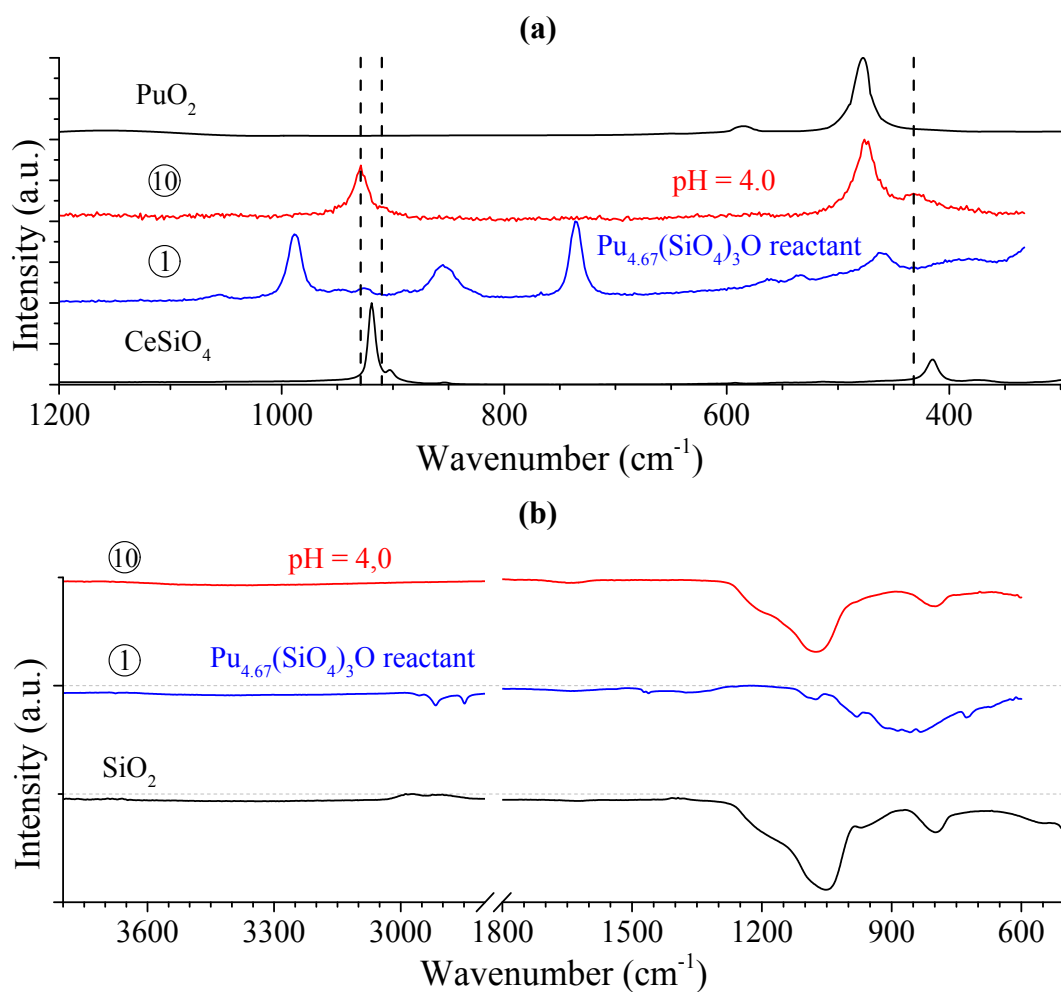

**Figure S15** Raman (a) and infrared (b) spectra obtained for a  $\text{PuSiO}_4$  containing sample (10) from  $\text{Pu}_{4.67}(\text{SiO}_4)_3\text{O}$  reactant (1) with 0.84 mmol of Pu in hydrochloric media (4mL) for starting pH values of 4.0.  $\text{CeSiO}_4$  and  $\text{PuO}_2$  Raman spectra were respectively extracted from 29 and 28.

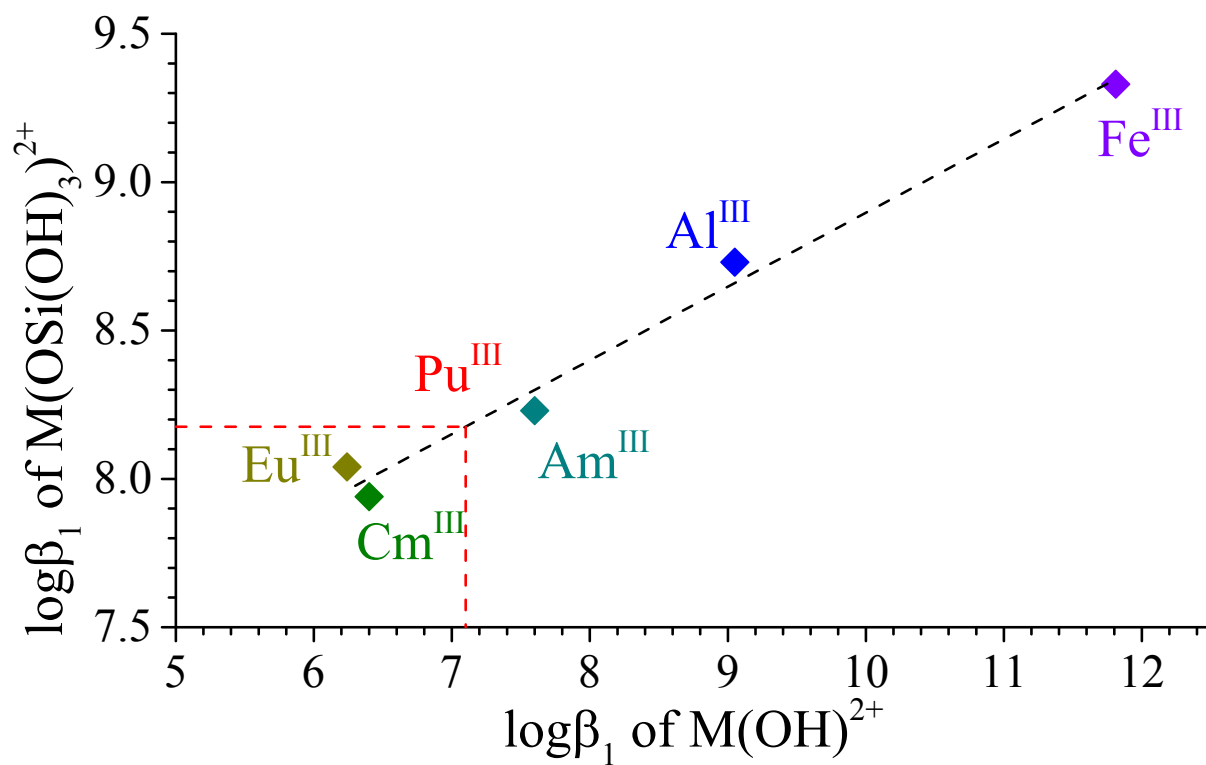

**Figure S16.** Comparison of the stability constants for the formation of metal-o-silicate and metal hydroxide complexes for M(III)-elements. Considered thermodynamics data available in **Table S4**.



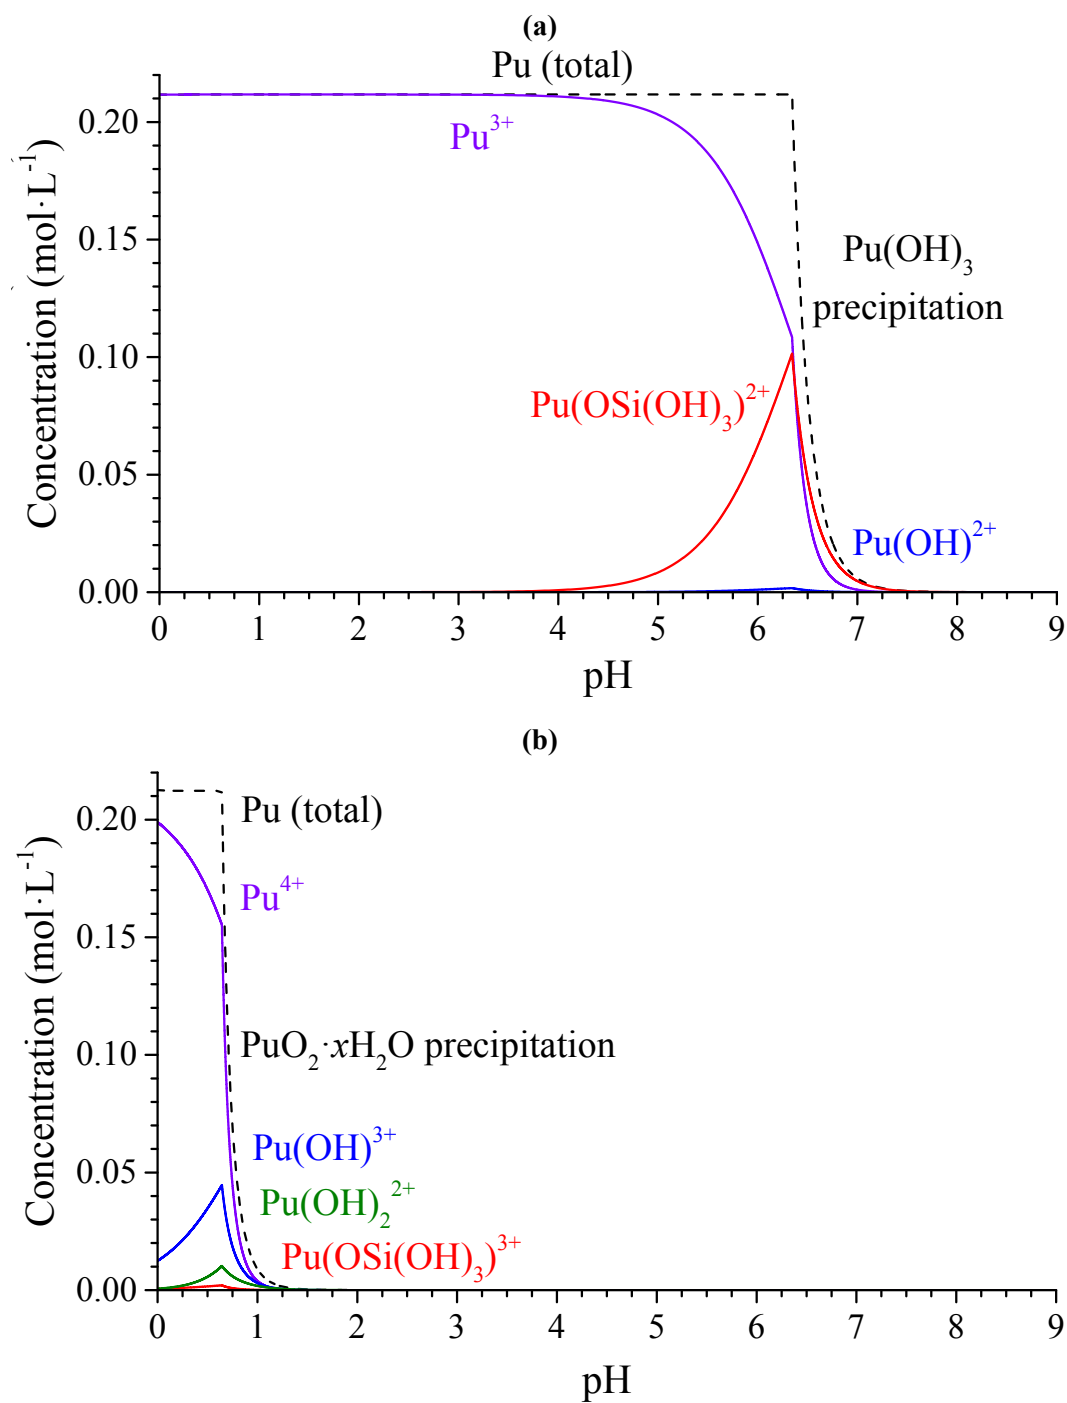

**Figure S17.** Speciation diagrams of Pu(III) (a) and Pu(IV) (b) determined by PhreeqC calculations<sup>30</sup> at room temperature with  $C_{\text{Si total}} \approx C_{\text{Pu total}} = 0.21 \text{ mol}\cdot\text{L}^{-1}$ . Thermodynamics data considered for these calculations are gathered in **Table S3**.

## REFERENCES

1. Estevenon, P.; Welcomme, E.; Szenknect, S.; Mesbah, A.; Moisy, P.; Poinssot, C.; Dacheux, N., Multiparametric study of the synthesis of ThSiO<sub>4</sub> under hydrothermal conditions. *Inorganic Chemistry* **2018**, *57*, 9393-9402.
2. Estevenon, P.; Welcomme, E.; Szenknect, S.; Mesbah, A.; Moisy, P.; Poinssot, C.; Dacheux, N., Impact of carbonate ions on the synthesis of ThSiO<sub>4</sub> under hydrothermal conditions. *Inorganic Chemistry* **2018**, *57*, 12398-12408.
3. Mesbah, A.; Szenknect, S.; Clavier, N.; Lozano-Rodriguez, J.; Poinssot, C.; Den Auwer, C.; Ewing, R. C.; Dacheux, N., Coffinite, USiO<sub>4</sub>, is abundant in nature: so why is it so difficult to synthesize? *Inorganic Chemistry* **2015**, *54*, 6687-6696.
4. de Alleluia, I. B. Festkörperchemische Untersuchungen zum System Uranoxid-Dysprosiumoxid un über Silikate der dreiwertigen Transurane (Pu, Am, Cm). Ph.D. Thesis. Fakultät für Chemie der Universität Karlsruhe, Karlsruhe, Germany, 1979.
5. de Alleluia, I. B.; Berndt, U.; Keller, C., Silicates of tervalent transuranium elements. *Revue de Chimie Minérale* **1983**, *20*, 441-448.
6. Uchida, T.; Nakamichi, S.; Sunaoshi, T.; Morimoto, K.; Kato, M.; Kihara, Y., Phase states in the Pu-Si-O ternary system. *IOP Conference Series: Materials Science and Engineering* **2010**, *9*.
7. Keller, C., Untersuchungen über die Germanate und Silikate des Typs ABO<sub>4</sub> der vierwertigen Elemente Thorium bis Americium. *Nukleonik* **1963**, *5*, 41-48.
8. Keller, C., Über die Festkörperchemie der Actiniden-oxide. *Karlsruhe Kernforschungszentrum report* **1964**, *KFK 225*.
9. Shannon, R. D., Revised effective ionic radii and systematic studies of interatomic distances in halides and chalcogenides. *Acta Crystallographica Section A*. **1976**, *32*, 751-767.
10. Guillaumont, R.; Fanghänel, T.; Neck, V.; Fuger, J.; Palmer, D. A.; Grenthe, I.; Rand, M. H., *Update on the chemical thermodynamics of uranium, neptunium, plutonium, americium and technetium*. Elsevier: Issy-les-Moulineaux, France, 2003.
11. Riglet-Martial, C.; Vitorge, P.; Calmon, V., Electrochemical Characterisation of the Ce(IV) Limiting Carbonate Complex. *Radiochimica Acta* **1998**, *82*, 69-76.
12. Rand, M. H.; Fuger, J.; Grenthe, I.; Neck, V.; Rai, D., *Chemical thermodynamics of thorium*. Issy-les-Moulineaux, France, 2009.
13. Giffaut, E.; Grivé, M.; Blanc, P.; Vieillard, P.; Colàs, E.; Gailhanou, H.; Gaboreau, S.; Marty, N.; Madé, B.; Duro, L., Andra thermodynamic database for performance assessment: ThermoChimie. *Applied Geochemistry* **2014** *49*, 225-236.
14. Lemire, R. J.; Fuger, J.; Spahiu, K.; Sullivan, J. C.; Nitsche, H.; Ullman, W. J.; Potter, P.; Vitorge, P.; Rand, M. H.; Wanner, H.; Rydberg, J., *Chemical thermodynamics of neptunium and plutonium*. Issy-les-Moulineaux, France, 2001.
15. Yusov, A. B.; Fedosseev, A. M.; Delegard, C. H., Hydrolysis of Np(IV) and Pu(IV) and their complexation by aqueous Si(OH)<sub>4</sub>. *Radiochimica Acta* **2004**, *92*, 869-881.
16. Neck, V.; Kim, J. I., Solubility and hydrolysis of tetravalent actinides. *Radiochimica Acta* **2001**, *89*, 1-16.
17. Spahiu, K.; Bruno, J., A selected thermodynamic database for REE to be used in HLNW performance assessment exercises. *SKB* **1995**, *SKB Technical Report 95-35*.
18. Thakur, P.; Singh, D. K.; Choppin, G. R., Polymerization study of o-Si(OH)<sub>4</sub> and complexation with Am(III), Eu(III) and Cm(III). *Inorganica Chimica Acta* **2007**, *360*, 3705-3711.

19. Jensen, M. P. Competitive complexation studies of europium(III) and uranium(VI) complexation by aqueous orthosilicic acid. Ph.D. Thesis. Florida State University, Tallahassee, FL, United States, 1994.
20. Porter, R. A.; Weber, W. J. J., The interaction of silicic acid with iron(III) and uranyl ions in dilute aqueous solution. *Journal of Inorganic and Nuclear Chemistry* **1971**, *33*, 2443-2449.
21. Beauvy, M., Nonideality of the solid solution in (U,Pu)O<sub>2</sub> nuclear fuels. *Journal of Nuclear Materials* **1992**, *188*, 232-238.
22. Tas, A. C.; Akinc, M., Cerium oxygen apatite (Ce<sub>4.67</sub>[SiO<sub>4</sub>]<sub>3</sub>O) X-ray diffraction pattern revisited. *Powder diffraction* **1992**, *7*, 219-222.
23. Estevenon, P.; Kaczmarek, T.; Vadot, F.; Dumas, T.; Solari, P. L.; Welcomme, E.; Szenknect, S.; Mesbah, A.; Moisy, P.; Poinssot, C.; Dacheux, N., Formation of CeSiO<sub>4</sub> from cerium (III) silicate precursors. *Dalton Transactions* **2019**, *48*, 10455-10463.
24. Capdevila, H.; Vitorge, P.; Giffaut, E.; Delmau, L., Spectrophotometric study of the dissociation of the Pu(IV) carbonate limiting complex. *Radiochimica Acta* **1996**, *74*, 93-98.
25. Neck, V.; Runde, W.; Kim, J. I., Solid-liquid equilibria of neptunium(V) in carbonate solutions of different ionic strengths: II. Stability of the solid phases. *Journal of Alloys and Compounds* **1995**, *225*, 295-302.
26. Krot, N. N.; Shilov, V. P.; Yusov, A. B.; Tananaev, I. G.; Grigoriev, M. S.; Garnov, A. Y.; Perminov, V. P.; Astafurova, L. N. *Plutonium(IV) precipitates formed in alkaline media in the presence of various anions*; Pacific Northwest National Laboratory: 1998.
27. Madic, C.; Hobart, D. E.; Begun, G. M., Raman spectrometric studies of actinide(V) and -(VI) complexes in aqueous sodium carbonate solution and of solid sodium actinide(V) carbonate compounds. *Inorganic Chemistry* **1983**, *22*, 1494-1503.
28. Sarsfield, M. J.; Taylor, R. J.; Puxley, C.; Steele, H. M., Raman spectroscopy of plutonium dioxide and related materials. *Journal of Nuclear Materials* **2012**, *427*, 333-342.
29. Estevenon, P.; Welcomme, E.; Szenknect, S.; Mesbah, A.; Moisy, P.; Poinssot, C.; Dacheux, N., Preparation of CeSiO<sub>4</sub> from aqueous precursors under soft hydrothermal conditions. *Dalton Transactions* **2019**, *48*, 7551-7559.
30. Frontera, C.; Rodriguez-Carvajal, J., FullProf as a new tool for flipping ratio analysis. *Physica B: Condensed Matter* **2003**, *335*, 219-222.
